# Supplementary material
Source: publisher site journal article supplement (https://spandidos-publications.com/7154/downloadSupplementary)
Supplement: Supplementary file 1 [file downloadSupplementary]

## Sheet: Sheet1
Table SI. Original lists of fatty acid metabolism-associated genes and the list of intersection and union genes.
GeneCards (relevance score>20)	MSigDB	Literature	Intersection of the three	Union set of the three
ABCA1	AADAT	ABCD1	ACADL	AADAT
ABCA3	ACAA1	ABCD2	ACADM	AASS
ABCB11	ACAA2	ACAA1	ACADS	ABCA1
ABCC8	ACADL	ACAA2	ACADVL	ABCA3
ABCD1	ACADM	ACACA	ACOX1	ABCB1
ABCD3	ACADS	ACACB	ACSL1	ABCB11
ABCG2	ACADVL	ACAD9	ACSL4	ABCB4
ABHD5	ACAT2	ACADL	ACSL5	ABCC2
ACACA	ACO2	ACADM	ALDH3A2	ABCC8
ACAD9	ACOT2	ACADS	CPT1A	ABCD1
ACADL	ACOT8	ACADSB	CPT2	ABCD2
ACADM	ACOX1	ACADVL	CYP4A11	ABCD3
ACADS	ACSL1	ACAT1	ECHS1	ABCD4
ACADVL	ACSL4	ACAT2	EHHADH	ABCG2
ACAT1	ACSL5	ACLY	ELOVL5	ABHD5
ACOX1	ACSM3	ACOT1	ETFDH	ACAA1
ACOX2	ACSS1	ACOT2	FASN	ACAA2
ACP2	ADH1C	ACOT4	GCDH	ACACA
ACP5	ADH7	ACOT7	HADH	ACACB
ACSL1	ADIPOR2	ACOX1	HADHB	ACAD8
ACSL3	ADSL	ACOX3	HSD17B10	ACAD9
ACSL4	ALAD	ACSBG1	ALDH9A1	ACADL
ACSL5	ALDH1A1	ACSBG2	CRAT	ACADM
ADIPOQ	ALDH3A1	ACSL1	ACSM3	ACADS
AKR1D1	ALDH3A2	ACSL3	ACAA1	ACADSB
AKT1	ALDH9A1	ACSL4	ACAT2	ACADVL
ALB	ALDOA	ACSL5		ACAT1
ALDH2	AOC3	ACSL6		ACAT2
ALDH3A2	APEX1	ACSM1		ACBD5
ALDH5A1	AQP7	ACSM2A		ACE
ALDH6A1	AUH	ACSM2B		ACLY
ALOX12	BCKDHB	ACSM3		ACO2
ALOX5	BLVRA	ACSM4		ACOT1
AMACR	BMPR1B	ACSS1		ACOT2
APOA1	BPHL	ACSS2		ACOT4
APOB	CA2	ACSS3		ACOT7
APOC3	CA4	ADH1A		ACOT8
APOE	CA6	ADH1B		ACOX1
ASAH1	CBR1	ADH1C		ACOX2
ASL	CBR3	ADH4		ACOX3
ASS1	CD1D	ADH5		ACP1
BAAT	CD36	ADH6		ACP2
BCAT2	CEL	ADH7		ACP5
BCKDHA	CIDEA	ALDH1B1		ACP6
BCKDHB	CPOX	ALDH2		ACSBG1
BTD	CPT1A	ALDH3A2		ACSBG2
CAT	CPT2	ALDH7A1		ACSF3
CBS	CRAT	ALDH9A1		ACSL1
CD36	CRYZ	CPT1A		ACSL3
CES1	CYP1A1	CPT1B		ACSL4
CETP	CYP4A11	CPT1C		ACSL5
CPT1A	CYP4A22	CPT2		ACSL6
CPT2	D2HGDH	CRAT		ACSM1
CRABP1	DECR1	CROT		ACSM2A
CRABP2	DHCR24	CYP4A11		ACSM2B
CRP	DLD	CYP4A22		ACSM3
CYP1A1	DLST	ECHS1		ACSM4
CYP1A2	ECH1	ECI1		ACSS1
CYP27A1	ECHS1	ECI2		ACSS2
CYP2A6	ECI1	EHHADH		ACSS3
CYP2B6	ECI2	ELOVL1		ACY1
CYP2C19	EHHADH	ELOVL2		ADA
CYP2C8	ELOVL5	ELOVL3		ADH1A
CYP2C9	ENO2	ELOVL4		ADH1B
CYP2D6	ENO3	ELOVL5		ADH1C
CYP2E1	EPHX1	ELOVL6		ADH4
CYP3A4	ERP29	ELOVL7		ADH5
CYP4A11	ETFDH	ETFA		ADH6
CYP7A1	FABP1	ETFB		ADH7
CYP7B1	FABP2	ETFDH		ADIPOQ
DAO	FASN	FASN		ADIPOR2
DBT	FH	GCDH		ADRB3
DDC	FMO1	HACD1		ADSL
DGAT1	G0S2	HACD2		AFP
DLD	GABARAPL1	HACD3		AGK
ECHS1	GAD2	HACD4		AGPAT1
EHHADH	GAPDHS	HADH		AGPAT2
ELOVL1	GCDH	HADHA		AGXT
ELOVL2	GLUL	HADHB		AHCY
ELOVL3	GPD1	HSD17B10		AKR1A1
ELOVL4	GPD2	HSD17B12		AKR1C2
ELOVL5	GRHPR	MCAT		AKR1D1
ELOVL6	GSTZ1	MECR		AKT1
ELOVL7	H2AZ1	OLAH		AKT2
ETFA	HADH	OXSM		ALAD
ETFB	HADHB	PEX11G		ALB
ETFDH	HAO2	PEX13		ALDH18A1
FA2H	HCCS	PEX14		ALDH1A1
FAAH	HIBCH	PPT1		ALDH1B1
FAAH2	HMGCL	PPT2		ALDH2
FABP1	HMGCS1	SLC25A20		ALDH3A1
FABP12	HMGCS2	TECR		ALDH3A2
FABP2	HPGD			ALDH4A1
FABP3	HSD17B10			ALDH5A1
FABP4	HSD17B11			ALDH6A1
FABP5	HSD17B4			ALDH7A1
FABP6	HSD17B7			ALDH9A1
FABP7	HSDL2			ALDOA
FABP9	HSP90AA1			ALOX12
FADS1	HSPH1			ALOX15
FADS2	IDH1			ALOX15B
FADS3	IDH3B			ALOX5
FAR1	IDH3G			AMACR
FASN	IDI1			AOC3
FFAR1	IL4I1			APEX1
FFAR2	INMT			APOA1
FFAR3	KMT5A			APOA2
FFAR4	LDHA			APOA5
FH	LGALS1			APOB
GAA	LTC4S			APOC3
GAREM2	MAOA			APOE
GBA	MCEE			APP
GCDH	MDH1			AQP7
GCG	MDH2			AR
GCK	ME1			ARG1
GGT1	METAP1			ARSA
GHRL	MGLL			ARV1
GNE	MIF			ASAH1
GPBAR1	MIX23			ASL
GPT	MLYCD			ASPA
HADH	NBN			ASS1
HADHA	NCAPH2			ATP8B1
HADHB	NSDHL			AUH
HFE	NTHL1			BAAT
HMGCL	ODC1			BCAT1
HMGCR	OSTC			BCAT2
HNF4A	PCBD1			BCHE
HPD	PDHA1			BCKDHA
HPRT1	PDHB			BCKDHB
HSD17B10	PPARA			BCL2
HSD17B4	PRDX6			BCS1L
HSD3B7	PSME1			BGLAP
IGF1	PTPRG			BLVRA
IL1B	PTS			BMPR1B
IL6	RAP1GDS1			BPHL
INS	RDH11			BRAF
INSR	RDH16			BRCA1
IRS1	REEP6			BTD
IVD	RETSAT			C1QTNF3-AMACR
LCAT	S100A10			C3
LDLR	SDHA			CA2
LEP	SDHC			CA4
LEPR	SDHD			CA6
LIAS	SERINC1			CASP3
LIPA	SLC22A5			CASP8
LIPC	SMS			CASR
LIPE	SUCLA2			CAT
LMNA	SUCLG1			CAV1
LPL	SUCLG2			CBR1
MIR122	TDO2			CBR3
MLYCD	TP53INP2			CBS
MMAA	UBE2L6			CCK
MMAB	UGDH			CCL2
MMACHC	UROD			CD1D
MMUT	UROS			CD36
MTHFR	VNN1			CEL
MTR	XIST			CES1
MT-TL1	YWHAH			CETP
MTTP				CFTR
NPC1				CIDEA
NR1H2				CNR1
NR1H4				COMMD1
OTC				COMT
PAH				COX5A
PC				CP
PCCA				CPOX
PCCB				CPS1
PDHA1				CPT1A
PEX1				CPT1B
PEX10				CPT1C
PEX11B				CPT2
PEX12				CRABP1
PEX13				CRABP2
PEX14				CRAT
PEX16				CROT
PEX19				CRP
PEX2				CRYZ
PEX26				CS
PEX3				CSF2RA
PEX5				CTH
PEX6				CTNNB1
PEX7				CTSD
PHYH				CUBN
PLA2G2A				CXCL8
PLA2G4A				CYB5R3
PLA2G6				CYP19A1
PLCH2				CYP1A1
PNPLA2				CYP1A2
PNPLA3				CYP1B1
POLG				CYP26A1
PPARA				CYP27A1
PPARD				CYP2A6
PPARG				CYP2B6
PPARGC1A				CYP2C19
PRODH				CYP2C8
PTGS2				CYP2C9
RARA				CYP2D6
RARB				CYP2E1
RETN				CYP2J2
RXRA				CYP2U1
SCD				CYP3A4
SCP2				CYP3A5
SERPINE1				CYP4A11
SFTPB				CYP4A22
SFTPC				CYP4F11
SIRT1				CYP4F2
SLC10A1				CYP4F3
SLC10A2				CYP4V2
SLC16A1				CYP7A1
SLC17A5				CYP7B1
SLC22A5				D2HGDH
SLC25A13				DAO
SLC25A20				DBT
SLC27A1				DDC
SLC27A2				DECR1
SLC27A3				DEGS1
SLC27A4				DGAT1
SLC27A5				DGAT2
SLC27A6				DHCR24
SLC2A1				DHFR
SLC3A1				DLD
SLC7A7				DLST
SMPD1				DNAJC19
SOD1				DPP4
SREBF1				DPYD
TAT				ECH1
TLR4				ECHS1
TNF				ECI1
TP53				ECI2
TPK1				EGF
UCP2				EGFR
UGT1A1				EHHADH
VDR				ELOVL1
XDH				ELOVL2
HGD				ELOVL3
ACSF3				ELOVL4
TH				ELOVL5
SLC7A5				ELOVL6
ABCD4				ELOVL7
FADS6				ENO2
ACOT8				ENO3
CSF2RA				ENPP1
CYP1B1				EPHX1
NAGS				EPHX2
DGAT2				ERBB2
RBP4				ERP29
ALAD				ESR1
AUH				ETFA
SLCO1B1				ETFB
PTEN				ETFDH
PON1				F2
SLC2A9				FA2H
GSTP1				FAAH
CFTR				FAAH2
BGLAP				FABP1
PNLIP				FABP12
CNR1				FABP2
UCP3				FABP3
ACADSB				FABP4
ACSL6				FABP5
OPA3				FABP5P3
ACSBG1				FABP6
G6PD				FABP7
TJP2				FABP9
FAS				FADS1
CYP4F2				FADS2
TTR				FADS2B
HNF1A				FADS3
FAH				FADS6
FAR2				FAH
CYP3A5				FAR1
CPT1B				FAR2
RARG				FAS
PRKAA2				FASN
CCL2				FAXDC2
UCP1				FBP1
G6PC1				FDFT1
F2				FFAR1
CUBN				FFAR2
ACE				FFAR3
GFAP				FFAR4
PNPLA8				FGF21
PNPO				FGFR1
APOA5				FH
PIK3CA				FLAD1
FLAD1				FMO1
ACP1				G0S2
CYP2J2				G6PC1
NOS3				G6PD
MPO				GAA
MCCC1				GABARAPL1
AKT2				GABBR1
ALOX15				GABRA2
CPS1				GABRA3
PCK1				GABRG2
LIPG				GAD1
TANGO2				GAD2
LMBRD1				GAMT
NR1I2				GAPDHS
ACACB				GAREM2
OGDH				GATAD1
MGLL				GATM
HIBCH				GBA
GATM				GCDH
ACY1				GCG
ESR1				GCH1
NR3C1				GCK
SLC25A4				GFAP
PRPS1				GGT1
GLUD1				GH1
NEU1				GHRL
OAT				GK
KRAS				GLA
GOT2				GLDC
COX5A				GLS
PTS				GLUD1
ABCB4				GLUL
HLCS				GLYCTK
CASR				GNE
AASS				GOT2
SDHA				GPBAR1
CYB5R3				GPD1
AGPAT2				GPD2
GSS				GPT
MTOR				GRHPR
IL10				GSR
BCAT1				GSS
KCNJ11				GSTM1
ARG1				GSTP1
MCEE				GSTZ1
CYP4F3				GUSB
GLDC				H2AZ1
HIF1A				HACD1
AFP				HACD2
ABCD2				HACD3
PSAP				HACD4
ASPA				HACL1
PTGS1				HADH
C1QTNF3-AMACR				HADHA
GPD1				HADHB
ABCC2				HAO2
ADIPOR2				HBB
CYP4V2				HCAR2
CYP19A1				HCCS
AGXT				HCFC1
DHFR				HFE
MVK				HGD
BRCA1				HIBCH
PCK2				HIF1A
NR1H3				HLCS
CAV1				HMGCL
GLUL				HMGCR
ACSM1				HMGCS1
SLC51B				HMGCS2
UGT1A8				HMOX1
GCH1				HNF1A
EPHX1				HNF4A
NAAA				HP
DECR1				HPD
ADSL				HPGD
CEL				HPRT1
ABCB1				HSD11B1
PRKAA1				HSD17B10
SLC19A3				HSD17B11
TAFAZZIN				HSD17B12
ARV1				HSD17B4
SREBF2				HSD17B7
MYC				HSD3B7
CS				HSDL2
FADS2B				HSP90AA1
LIPF				HSPH1
SLC2A4				IDH1
FABP5P3				IDH2
MAPK1				IDH3B
EPHX2				IDH3G
APP				IDI1
KYNU				IFNG
SLC1A1				IGF1
ACAD8				IGF2
ACSBG2				IGFBP3
ALDH4A1				IL10
MFSD2A				IL1B
POMC				IL4I1
HMOX1				IL6
CYP4F11				INMT
RARRES2				INS
ARSA				INSR
CCK				IRS1
GABBR1				IVD
NR1I3				KCNJ11
PCSK9				KMT5A
MT-ND1				KRAS
GATAD1				KYNU
AKR1C2				L2HGDH
PIPOX				LCAT
BCS1L				LDHA
ENPP1				LDLR
FAXDC2				LEP
CYP2U1				LEPR
GH1				LGALS1
PLIN2				LIAS
SLC4A1				LIPA
UGT1A9				LIPC
MIR21				LIPE
MCCC2				LIPF
HACL1				LIPG
CYP26A1				LMBRD1
GABRG2				LMNA
PRKAB1				LPA
PYGM				LPAR1
ALDH9A1				LPAR2
CTH				LPAR3
SLC25A19				LPIN1
SCARB1				LPL
ATP8B1				LTC4S
ADRB3				MAOA
ALDH7A1				MAPK1
SLC34A1				MAPK8
EGF				MAT1A
SNCA				MCAT
COMT				MCCC1
CRAT				MCCC2
UGT1A6				MCEE
SUCLG1				MDH1
ACSM2B				MDH2
SLC2A2				ME1
SLC3A2				MECR
NAMPT				METAP1
SDHB				MFSD2A
HSD11B1				MGLL
GAD1				MIF
CASP3				MIR10B
IGFBP3				MIR122
MT-ATP6				MIR155
LPAR1				MIR21
EGFR				MIR33A
GLYCTK				MIR34A
SLC6A3				MIX23
CASP8				MLXIPL
PDK4				MLYCD
NDUFS4				MMAA
ACBD5				MMAB
TF				MMACHC
FGF21				MMUT
DPP4				MPO
RRM2B				MT-ATP6
BCL2				MT-CYB
ADA				MTHFD1
SERPINA1				MTHFR
GSTM1				MT-ND1
GSR				MT-ND4
GLA				MT-ND5
LPIN1				MT-ND6
SUCLA2				MTOR
HBB				MTR
AGPAT1				MT-TL1
IDH2				MTTP
ALOX15B				MVK
UMPS				MYC
VEGFA				NAAA
ACP6				NADK2
FDFT1				NAGS
SLC25A15				NAMPT
AKR1A1				NBN
MTHFD1				NCAPH2
AGK				NDUFS4
MAT1A				NEU1
FBP1				NFE2L2
NR3C2				NOS3
PDP1				NPC1
MIR33A				NR1H2
LPAR3				NR1H3
APOA2				NR1H4
ERBB2				NR1I2
PRMT7				NR1I3
MIR155				NR3C1
HCFC1				NR3C2
MT-ND6				NSDHL
ALDH18A1				NTHL1
NADK2				OAT
GRHPR				ODC1
SLC1A2				OGDH
LDHA				OLAH
C3				OPA3
FGFR1				OSTC
L2HGDH				OTC
CP				OXSM
BCHE				PAH
DNAJC19				PC
REN				PCBD1
MT-CYB				PCCA
HCAR2				PCCB
LPA				PCK1
MLXIPL				PCK2
DPYD				PCSK9
PPIG				PDHA1
ACSM3				PDHB
IGF2				PDK4
UGT2B7				PDP1
SHBG				PEX1
MIR10B				PEX10
PRDX1				PEX11B
ACOX3				PEX11G
GABRA3				PEX12
DEGS1				PEX13
GUSB				PEX14
PLTP				PEX16
TIMP1				PEX19
TTN				PEX2
SLC36A1				PEX26
SST				PEX3
AHCY				PEX5
SOAT2				PEX6
GLS				PEX7
GABRA2				PHGDH
HMGCS2				PHYH
CXCL8				PIK3CA
NFE2L2				PIPOX
ACAA1				PLA2G2A
PRKAG2				PLA2G4A
GK				PLA2G6
ALDH1A1				PLCH2
AR				PLIN2
SLC1A5				PLTP
TFRC				PNLIP
IFNG				PNPLA2
HP				PNPLA3
SLC25A1				PNPLA8
LPAR2				PNPO
CTSD				POLG
MIR34A				POMC
POR				PON1
ACAT2				POR
PHGDH				PPARA
COMMD1				PPARD
CTNNB1				PPARG
MAPK8				PPARGC1A
MT-ND4				PPIG
GAMT				PPT1
MT-ND5				PPT2
RYR1				PRDX1
BRAF				PRDX6
ODC1				PRKAA1
				PRKAA2
				PRKAB1
				PRKAG2
				PRMT7
				PRODH
				PRPS1
				PSAP
				PSME1
				PTEN
				PTGS1
				PTGS2
				PTPRG
				PTS
				PYGM
				RAP1GDS1
				RARA
				RARB
				RARG
				RARRES2
				RBP4
				RDH11
				RDH16
				REEP6
				REN
				RETN
				RETSAT
				RRM2B
				RXRA
				RYR1
				S100A10
				SCARB1
				SCD
				SCP2
				SDHA
				SDHB
				SDHC
				SDHD
				SERINC1
				SERPINA1
				SERPINE1
				SFTPB
				SFTPC
				SHBG
				SIRT1
				SLC10A1
				SLC10A2
				SLC16A1
				SLC17A5
				SLC19A3
				SLC1A1
				SLC1A2
				SLC1A5
				SLC22A5
				SLC25A1
				SLC25A13
				SLC25A15
				SLC25A19
				SLC25A20
				SLC25A4
				SLC27A1
				SLC27A2
				SLC27A3
				SLC27A4
				SLC27A5
				SLC27A6
				SLC2A1
				SLC2A2
				SLC2A4
				SLC2A9
				SLC34A1
				SLC36A1
				SLC3A1
				SLC3A2
				SLC4A1
				SLC51B
				SLC6A3
				SLC7A5
				SLC7A7
				SLCO1B1
				SMPD1
				SMS
				SNCA
				SOAT2
				SOD1
				SREBF1
				SREBF2
				SST
				SUCLA2
				SUCLG1
				SUCLG2
				TAFAZZIN
				TANGO2
				TAT
				TDO2
				TECR
				TF
				TFRC
				TH
				TIMP1
				TJP2
				TLR4
				TNF
				TP53
				TP53INP2
				TPK1
				TTN
				TTR
				UBE2L6
				UCP1
				UCP2
				UCP3
				UGDH
				UGT1A1
				UGT1A6
				UGT1A8
				UGT1A9
				UGT2B7
				UMPS
				UROD
				UROS
				VDR
				VEGFA
				VNN1
				XDH
				XIST
				YWHAH
MSigDB, Molecular Signatures Database.
